1 Article

2 Discoveries

3  
4 Analysis of 19 Heliconiine Butterflies Shows Rapid TE-based Diversification and  
5 Multiple SINE Births and Deaths

6  
7 David A Ray<sup>1\*</sup>, Jenna R Grimshaw<sup>1</sup>, Michaela K Halsey<sup>1</sup>, Jennifer M Korstian<sup>1</sup>, Austin B  
8 Osmanski<sup>1</sup>, Kevin AM Sullivan<sup>1</sup>, Kristen A Wolf<sup>1</sup>, Harsith Reddy<sup>1</sup>, Nicole Foley<sup>1,2</sup>, Richard D  
9 Stevens<sup>3</sup>, Binyamin Knisbacher<sup>4,5</sup>, Orr Levy<sup>6</sup>, Brian Counterman<sup>7</sup>, Nathan B Edelman<sup>8</sup>, James  
10 Mallet<sup>8</sup>

11  
12 1 – Department of Biological Science, Texas Tech University, Lubbock, TX

13 2 – Current address: Department of Veterinary Integrative Biosciences, College of Veterinary  
14 Medicine, Texas A&M University, College Station, TX

15 3 – Department of Natural Resources Management, Texas Tech University, Lubbock, TX

16 4 – The Mina and Everard Goodman Faculty of Life Sciences, Bar-Ilan University, Ramat Gan  
17 52900, Israel.

18 5 – Current address: Broad Institute of MIT and Harvard, Cambridge, MA.

19 6 – Department of Physics, Bar-Ilan University, Ramat Gan 52900, Israel.

20 7 – Department of Biological Sciences, Mississippi State University, Mississippi State, MS

21 8 – Department of Organismic and Evolutionary Biology, Harvard University, Cambridge, MA

22 \* - Corresponding author, david.4.ray@gmail.com

23

24

## 25 **Abstract**

26 Transposable elements (TEs) play major roles in the evolution of genome structure and function.  
27 However, because of their repetitive nature, they are difficult to annotate and discovering the specific roles  
28 they may play in a lineage can be a daunting task. Heliconiine butterflies are models for the study of multiple  
29 evolutionary processes including phenotype evolution and hybridization. We attempted to determine how  
30 TEs may play a role in the diversification of genomes within this clade by performing a detailed  
31 examination of TE content and accumulation in 19 species whose genomes were recently sequenced. We  
32 found that TE content has diverged substantially and rapidly in the time since several subclades shared a  
33 common ancestor with each lineage harboring a unique TE repertoire. Several novel SINE lineages have  
34 been established that are restricted to a subset of species. Furthermore, the previously described SINE,  
35 *Metulj*, appears to have gone extinct in two subclades while expanding to significant numbers in others.  
36 Finally, a burst of TE origination corresponds temporally to a burst of speciation in the clade, potentially  
37 providing support to hypotheses that TEs are drivers of genotypic and phenotypic diversification. This  
38 diversity in TE content and activity has the potential to impact how heliconiine butterflies continue to evolve  
39 and diverge.

## 40 **Introduction**

41 TEs have been described as ‘drivers of genome evolution’ (Kazazian 2004). Indeed, transposable  
42 elements (TEs) are major contributors to processes that influence genomic change (Kidwell and Lisch  
43 1997). TEs mediate small-scale changes but also influence large-scale structural changes including  
44 deletions, translocations, duplications, ectopic recombination and are intimately associated with the  
45 evolution of genome size in some lineages (Lim and Simmons 1994; Gray 2000; Hedges and Deininger  
46 2007; Carbone, et al. 2014; Grabundzija, et al. 2016; Kapusta, et al. 2017). Transposition is an efficient  
47 mechanism for generating widespread genetic diversity that evolutionary processes may build on, leading  
48 to phenotypic and taxonomic diversity. While structural changes induced by the insertion of hundreds or  
49 thousands of 200 to 10,000 bp units at a time are likely important to evolutionary processes, it has also been  
50 argued that by contributing multiple copies of ready-to-use regulatory motifs, transposons also induce more  
51 subtle but also more significant (in the long run) regulatory innovation (Rebollo, et al. 2010; Rebollo, et al.  
52 2012; Ellison and Bachtrog 2013; Jacques, et al. 2013; Sundaram, et al. 2014; Chuong, et al. 2016; Mita  
53 and Boeke 2016; Chuong, et al. 2017; Sundaram, et al. 2017; Trizzino, et al. 2017).

54 The idea that by generating genomic diversity TEs play a significant role in adaptive change is not  
55 new. On the contrary, the discoverer of TEs herself, Barbara McClintock, proposed that TEs may act as a  
56 mechanism for the genome to respond to stress in an adaptive manner (McClintock 1956, 1984). More  
57 recently, Oliver and Greene (2011, 2012) proposed the TE Thrust Hypothesis, suggesting that TEs enhance

58 evolutionary potential by introducing variation in the genomes they occupy. In a related hypothesis, Zeh et  
59 al. (2009) suggested reduced epigenetic suppression of TEs when organisms are under stress, thereby  
60 increasing their activity and their impact on genome structure. This is referred to as the Epi-Transposon  
61 Hypothesis. Other authors have offered similar and/or related ideas, in every case linking transposon  
62 activity to adaptation (Jurka, et al. 2011; Jurka, et al. 2012; Koonin 2016a, b).

63 While these ideas represent significant advances in our understanding of TE-genome interactions,  
64 several limitations have restricted the scope of research on the relationship between TEs and diversification,  
65 preventing tests of these major hypotheses and generalization across taxa. First, the comparisons undertaken  
66 thus far involve relatively deep divergences that make understanding the changes that occur at lower  
67 taxonomic levels difficult to tease apart. Second, cost effective approaches to densely sample divergent  
68 clades have only become available recently, limiting prior comparisons to such deep divergences in an  
69 effort to maximize observable differences. Third, a mechanistic understanding of TE action has been  
70 confined to lab models and their cell lines, limiting research into the emergence and control of phenotypic  
71 traits. However, recent advances have created opportunities to move past these barriers. Primarily, cost  
72 reductions and advances in sequencing technologies and genome analysis have allowed us to examine larger  
73 and larger numbers of whole genomes, including whole genome comparisons among relatively closely  
74 related species (Lamichhaney, et al. 2015; Nater, et al. 2015). A narrowed focus has the potential to inform  
75 the scientific community of the influences TEs may have at the early stages of taxonomic divergence.

76 Butterflies of the genus *Heliconius* and related genera are models for the study of several  
77 evolutionary processes from hybridization to the evolution of Müllerian mimicry (Heliconius 2012). They  
78 have experienced multiple recent bursts of speciation and represent an adaptive radiation that is ripe for  
79 study at the genome level (Supple, et al. 2013; Supple, et al. 2014; Kozak, et al. 2015; Arias, et al. 2017).  
80 These characteristics create an excellent opportunity to examine patterns of TE evolution in a rapidly  
81 diversifying clade, allowing us to ask questions about how the TEs themselves evolve as species diverge  
82 from one another.

83 TEs from *Heliconius* were first described as part of the first *Heliconius melpomene* genome project  
84 (Heliconius 2012) and examined in detail by Lavoie et al. (2013). In that work, the TE landscape was  
85 revealed to be exceptionally diverse with large numbers of active LINEs (Long INterspersed Elements) and  
86 large genome proportions derived from SINEs (Short INterspersed Elements) and rolling circle transposons  
87 (Helitrons). Further, the genome was shown to be labile, especially with regard to larger TEs, which appear  
88 to be removed regularly via non-homologous recombination. This is in line with recent hypotheses related  
89 to genome evolution and TE content, and in particular, the accordion model of genome evolution, in which  
90 some DNA is contributed while other DNA is jettisoned over evolutionary time (Kapusta, et al. 2017).

91           Recently, multiple representatives from this clade were subjected to whole genome sequence  
92 analysis using multiple assembly technologies, providing us with an opportunity to examine the evolution  
93 of TEs in detail across 20 heliconiine species (Edelman et al. submitted). We performed de novo TE  
94 annotations on 19 of these genomes and compared the TE landscapes across the heliconiine tree, revealing  
95 patterns of transposable element evolution not yet seen at this fine a scale. We see that differential TE  
96 accumulation can be established rapidly across lineages and that particular families and subfamilies  
97 establish themselves differentially in independent lineages in relatively short periods of time.

98           This detailed examination of TE evolution in closely related species lays the groundwork for  
99 additional analysis of transposable elements as members of genomic communities that evolve in ways  
100 similar to natural communities in ecosystems. It also opens the door to examining genomic factors that may  
101 influence the relative success of TEs in each genome as they diverge from one another.

## 102 **Results**

### 103 *Data:*

104           Draft genomes for 19 species were analyzed for transposable element content (Figure 1). Details  
105 of each assembly are available in Edelman et al. (submitted) and in Supplemental Table 1. One species, *H.*  
106 *melpomene*, has been analyzed thoroughly for TEs and therefore served as a starting point for some  
107 downstream analyses (Heliconius 2012; Lavoie, et al. 2013). We assumed that any old, shared insertions  
108 among the species analyzed were identified as part of that analysis or are part of other insect TE libraries.

### 109 *Novel and Known TE Families:*

110           After culling to eliminate duplicates and previously identified TEs, 93 novel DNA transposon  
111 consensus sequences, 59 novel LINE consensus sequences, 136 novel Helitron elements, and 65 novel LTR  
112 elements were identified. Among SINEs, the previously identified Metulj family was examined using a  
113 network-based approach (Levy, et al. 2017). That analysis yielded 2483 novel subfamilies, adding  
114 substantially to the Metulj diversity (~30 subfamilies) described in (Lavoie et al. 2013).

115           Three novel SINE families, which can be grouped as a new superfamily we are calling ZenoSINEs  
116 because of their presumed mobilization partner and other shared characteristics, were also identified. A  
117 fourth novel SINE family with similarities to R1 LINEs was also identified. All novel TE consensus  
118 sequences will be deposited in DFAM (Hubley, et al. 2016).

### 119 *Recent vs. Ancient Taxonomic Distributions:*

120           Because our interest was in determining how TEs may be influencing genomic structure in modern  
121 species, we distinguished between recent and ancient accumulation patterns. RepeatMasker hits with  
122 divergences <0.05 from their respective consensus sequences were considered ‘recent’ and >0.05 as ‘old’.  
123 Applying a mutation rate of  $1.9 \times 10^{-9}$  substitutions/site/generation and four generations/year (Martin, et al.

124 2016) and assuming minimal differences among species places this boundary at around 6.6 Mya, allowing  
125 us to focus on accumulation patterns in the melpomene-sylvaniformes and erato-sara clades as well as the  
126 terminal branches leading to *H. doris*, *H. burneyi*, and the three outgroup taxa (Figure 1). For each TE  
127 (separated by names, class, or family, depending on the level of analysis), total base coverage was calculated  
128 and divided by the total genome size to give a relative proportion (Figure 2). The figure illustrates the  
129 distinct shift from SINE dominance in ancestral accumulation patterns toward RC, LINE, and DNA  
130 dominance in the melpomene and sylvaniform clades in addition to distinct patterns in several additional  
131 species. Unpaired t-tests comparing all members of the erato-sara clade to melpomene-sylvaniform species  
132 indicates significant differences between accumulation patterns of recent SINE, LINE, DNA transposon,  
133 and rolling circle transposons insertions by class,  $p < 0.0001$ ,  $p = 0.0229$ ,  $p = 0.0078$ ,  $p = 0.0008$ ,  
134 respectively.

135 Examining TE accumulation at a finer scale reveals additional patterns. For example, while recently  
136 accumulating rolling circle transposons (Helitrons) contribute to all genomes, those contributions vary  
137 substantially (Figure 3), ranging from almost no Helitron content in *Agraulis vanillae* and *H. doris* to near  
138 complete dominance in all members of the melpomene and sylvaniform clades. Further, there are clear  
139 differences in which subfamilies of Helitron have mobilized (Supplemental Figures 1 and 2). Not  
140 surprisingly, the Helitron-like elements first described by Lavoie et al. and discovered in the *H. melpomene*  
141 genome are prevalent in the melpomene and sylvaniform clades, particularly *H. elevatus* and *H. pardalinus*.  
142 Different subfamilies have recently colonized species in the erato, sara, and doris clades and to a lesser  
143 extent.

144 Similarly, many DNA transposons have had substantially more recent success in mobilizing within  
145 the doris, melpomene, and sylvaniform clades, again with distinct families being more prevalent, depending  
146 on the lineage (Figure 3). The most obvious difference with regard to DNA transposons lies in the increased  
147 prevalence of PIF-Harbinger, piggyBac, hAT, and most TcMariner superfamily transposons in certain  
148 clades (Figure 3, Supplemental Figures 1 and 3), especially melpomene and sylvaniform. TcMariner  
149 elements also appear to be the only DNA transposons to have managed any success in the *H. burneyi* and  
150 *H. doris* genomes while *Eueides tales* and *H. sara* seem to have avoided any substantial DNA transposon  
151 accumulation in the recent past.

152 Recent LTR retrotransposon accumulation patterns exhibit similar diversity (Figure 3,  
153 Supplemental Figures 1 and 4). Despite the fact there is not a significant difference in overall accumulations  
154 between members of the combined erato-sara clade and species in the combined melpomene-sylvaniform  
155 clade (unpaired t-test,  $p = 0.2804$ ), there is a distinct bias toward Gypsy retrotransposons and a subset of  
156 generic LTRs in the melpomene and sylvaniform clades while a subset of LTR retrotransposons are  
157 preferred in species of the erato and sara clades as well as in *A. vanillae*. As with Helitrons and DNA

158 transposons, the identities of the LTR retrotransposons that have expanded in each group are distinct  
159 (Supplemental Figure 4).

160         Recent accumulation by LINEs is diverse but most prominent in *H. doris*, with CR1, Zenon and  
161 RTE elements dominating other LINEs (Figure 3, Supplemental Figure 5). Clades to the left in Figure 3  
162 have generally experienced much lower levels of recent non-LTR retrotransposon accumulation. In these  
163 clades, though, a variety of short, non-autonomous Penelope elements are much more prominent, especially  
164 in *H. telesiphe*. R2-Hero elements make up a large relative proportion of LINE-occupied space in *A.*  
165 *vanillae*. As with the previous classes, LINE identities are highly lineage-specific (Supplemental Figures 1  
166 and 5).

167         In many genomes, SINEs are the most prevalent TE component by genome proportion. As is  
168 apparent in Figure 2 and Supplemental Figure 6 this is also the case for several heliconiines. The Metulj  
169 family make the most significant recent contributions in clades other than melpomene and sylvaniform.  
170 ZenoSINEs are present only in those same clades. *H. doris* is an exception, with nearly as much  
171 accumulation from ZenoSINEs as from Metulj. Indeed, the distribution of ZenoSINEs is a puzzle. In  
172 addition to their presence in *H. doris*, and to a lesser extent *H. burneyi*, they are found primarily in *E. tales*  
173 and members of the erato and sara clades. ZenoSINEs are essentially absent from members of the  
174 melpomene and sylvaniform clades (Table 1). We examined the raw RepeatMasker output from each  
175 genome for the presence of any ZenoSINE elements greater than 100 bp in length. Counts ranged from 5-  
176 21 in the melpomene and sylvaniform clades. Sixty-two were found in *A. vanillae*, and only 12 were  
177 identifiable in *Dryas iulia*. Examination of the extracted hits on a clade by clade basis reveals that relatively  
178 few are likely to be genuine ZenoSINE elements. All of the hits from *A. vanillae* and members of the  
179 melpomene and sylvaniform clades were about half the size of the average ZenoSINE consensus, truncated  
180 at the 5' end. For hits in the *D. iulia* genome, the hits were also short but the truncation occurred at the 3'  
181 end. We suggest that the vast majority, if not all, such low-copy-number hits in Table 2 follow are similarly  
182 false positives.

183         Besides ZenoSINEs, four additional new families were identified. Two of these, Flambeau, and  
184 Julian SINEs are restricted to *D. iulia*. Brushfoot is also restricted to *D. iulia* within heliconiines but has  
185 some resemblance to a possible cousin in the genome of the pierid butterfly, *Leptidea sinapsis*. Fritillar  
186 SINEs are restricted to the *A. vanillae* genome. With the exception of Julian, all are present at relatively  
187 low numbers (Table 1). Further, our analysis of the rates of evolution of new TE lineages suggests that the  
188 erato-sara common ancestor, *H. doris*, and the outgroups were hotbeds of new SINE subfamily emergence  
189 (Table 2), each associated with dozens of new subfamilies, while the melpomene and sara clades are host  
190 to a single novel subfamily.



191 *SINE/LINE Partnerships:*

192 The 3' ends of SINEs are often very similar to their LINE partner (Ohshima and Okada 2005).  
193 Previous efforts by Lavoie et al. (2013) were unsuccessful in determining the LINE partner for Metulj, but  
194 based on our more complete analysis of the TE content of all 19 genomes, we now suspect that it is  
195 mobilized by an RTE family LINE (Supplemental Figure 7A). ZenoSINE, Fritillar, and Flambeau show  
196 similarity between their tails and the tail of LINES from the Zenon family (Supplemental Figure 7B),  
197 suggesting a similar relationship. Flambeau exhibits 3' similarity with R1 LINES (data not shown).

198 The SINE tail may influence the success of the SINE in hijacking the LINE enzymatic machinery  
199 at the ribosome (Dewannieux and Heidmann 2005). Our investigations into the evolution of the 3' tail  
200 revealed informative patterns (Supplemental Figure 8). In most *Heliconius*, young Metulj show a distinct  
201 bias toward A and T over G and C and A:T ratios are biased slightly toward T in young insertions, a signal  
202 not observed in older elements. The A prevalence over C and G is slightly higher in members of the erato  
203 and sara clades and distinctly higher in *D. iulia*, *A. vanillae*, and *H. doris*.

204 Because of the apparent partnership that has evolved between these SINEs and their partner LINES,  
205 one might expect similar recent accumulation profiles. However, no relationship between the accumulation  
206 patterns is easily resolvable (Figure 4). Indeed, while there does appear to be some mirroring in *H. doris*,  
207 *H. burneyi*, and possibly in the erato and sara clades, the accumulation patterns observed in melpomene and  
208 sylvaniform are essentially opposite. A similar lack of correspondence in landscapes is apparent for  
209 ZenoSINE and Zenon LINES. Examining correlations between recently accumulated SINEs and LINES  
210 also reveals no discernable pattern (Supplemental Figure 9). While the expected high correspondence  
211 between ZenoSINE and Zenon LINES is observed, so are high correlations with Dong and RTE-BovB.  
212 Further, the expected correlation between RTE-type LINES and Metulj is not observed.

213 *SINE Birth and Death:*

214 Four of the novel SINEs likely originated recently within the Heliconiini. A BLAST search of all  
215 taxa excluding *Heliconius* in the NCBI WGS database using ZenoSINE consensus sequences yields only  
216 severely truncated and low similarity hits in the genomes of other lineages. Analysis of Fritillar suggested  
217 that it is restricted to *A. vanillae*, strongly suggesting that it originated in that lineage. The BLAST search  
218 produced 12 high similarity, partial hits to the fellow nymphalid butterfly *Vanessa tameamea* (the  
219 Kamehameha butterfly, GCA\_002938995.1). The hits are limited to the 5' (likely tRNA-derived) half of  
220 the SINE suggesting that these are merely hits to a similar precursor tRNA in that genome.

221 ZenoSINE subfamilies are similarly restricted to a subset of heliconiine lineages (Figures 3 and 4),  
222 suggesting an origin near the base of the heliconiine clade. Our BLAST search yielded hits only to *H. aoede*

223 (GCA\_900068225.1), which is sister to the doris-wallacei-melpomene-sylvaniform assemblage. Questions  
224 that will be addressed below exist on how the current distribution came to be.

225 Metulj are present in all species examined, suggesting that their origin is more ancient but at least  
226 prior to the diversification of the Heliconiini. A BLAST search of the NCBI WGS database yields hits only  
227 in heliconiine genomes thus far deposited with NCBI. Similar results are obtained by a broader search of  
228 all insect nucleotides in the database. Thus, while a specific point of origin cannot be identified, we suggest  
229 that Metulj originated with the clade or shortly thereafter. The lack of any substantial recent accumulation  
230 in members of the melpomene and sylvaniform clades (Figure 3) strongly suggest that Metulj is dead or  
231 dying in those lineages.

232 *TE origination rates:*

233 Table 2 details the rates at which various branches in the phylogeny gained novel TEs. In agreement  
234 with much of the data presented above, the erato and sara clades along with *H. doris* and the three outgroups  
235 have been home to intensive SINE diversification while the melpomene and sylvaniform clades have played  
236 host to origination events for most other categories. The highest rates of TE origination appear to center on  
237 the ancestors of each of the two major subclades and in *H. doris*.

238 Using this information, we determined amounts of lineage-specific TE-derived DNA contributions  
239 along selected branches of the tree (Supplemental File 1). Substantial contributions to genome diversity  
240 were observed. For example, at least 15% (~85 Mb) of the *D. iulia* genome is uniquely TE-derived when  
241 compared to any other species analyzed with most of that content (~11%, ~62 Mb) derived from lineage-  
242 specific SINEs. Around 5.5% (22 Mb) of the *H. doris* genome is unique to that lineage. Clade-specific TE  
243 contributions to the erato-sara and melpomene-sylvaniform clades are similar, averaging 5.9% (~24 Mb)  
244 and 6.9% (~23 Mb), respectively. Not surprisingly given the observations above, those contributions are  
245 quite distinct, with SINEs making up the majority of novel DNA (~15 Mb) in the erato-sara clade and DNA  
246 transposons comprising the majority (~18 Mb) in members of melpomene and sylvaniform.

247 *Genome size correlations:*

248 Recently, Talla et al. (2017) found that genome size in wood-white butterflies (Leptidea) correlated  
249 strongly with TE accumulation. To determine if the same phenomenon was observable in heliconiines, we  
250 followed Talla et al. (2017) and calculated a linear model of genome size as a function of TE length, and  
251 found no significant correlation ( $p=0.11$ ). However, we did find a marginally significant correlation of  
252 genome size with TE count ( $p=0.0165$ ). We repeated the analysis accounting for phylogenetic relatedness  
253 using the *pic* function in the R package ape v5.1 using a tree generated from concatenated, non-coding,  
254 fully-aligned regions to perform the phylogenetic correction (Edelman et al). Our results were consistent,



255 though for both comparisons relatedness did account for some of the variation (TE length  $p=0.306$ , TE  
256 count  $p=0.0275$ ). All following analyses were performed with this phylogenetic correction.

257 Because these species diverged very recently, we hypothesized that recent insertions may be more  
258 relevant for differences in genome size. However, this was not consistent with the data. When only  
259 considering TE insertions with divergence values less than 0.05, we found no association of genome size  
260 with either TE length ( $p=0.0891$ ) or TE count ( $p=0.482$ ).

261 To determine if any one element could be influencing genome size evolution, we next classified  
262 each insertion based on both class and family and analyzed each independently. For the full data (recent  
263 and old elements), after correcting for multiple comparisons, only I.Nimb elements were significantly  
264 associated with genome size (I.Nimb length  $p=5.17e^{-5}$ , I.Nimb count  $p=8.76e^{-5}$ ). However, I.Nimb  
265 elements make up only a small fraction of the genome, and the pattern appears to be driven by two outliers,  
266 *H. telesiphe* and *E. tales* (Supplemental Figure 10). For the recent elements, again a single element,  
267 Penelope, is associated with genome size (Supplemental Figure 11), but here the association is with count  
268 alone, and again it appears to be driven by the high density of Penelope in *H. telesiphe* (Penelope length  
269  $p=.059$ , Penelope count  $p=1.1e^{-4}$ ).

## 270 Discussion

271 TE distributions and expansion dynamics can reveal vital information about evolutionary  
272 processes. For example, taxonomic disparities in the distribution of a TE family is a sign of possible  
273 horizontal transfer among disparate lineages. The presence of high numbers of orphaned TE fragments is  
274 an indicator of high rates of non-homologous recombination that acts to remove DNA from the genome,  
275 impacting genome sizes. Thus, detailed examinations of TE content is an important step in understanding  
276 how genomes evolve.

277 This work is the first large-scale, comprehensive analysis of TE dynamics in a coherent clade and  
278 reveals substantial information on how heliconiine genomes diversify. Our analysis of recent accumulation  
279 patterns reveals that clear taxonomic differences have evolved with regard to the relative success of TE  
280 families across the clade.

281 The most obvious differences are apparent shifts in which TEs succeed in proliferating in each  
282 clade. A basal divergence in TE accumulation has evolved in *Heliconius*, with members of the melpomene  
283 and silvaniform clades showing a bias for rolling circle transposons, DNA transposons and LINES.  
284 Meanwhile, their cousins in the erato and sara clades have been host to substantial recent SINE  
285 accumulations. Two other *Heliconius* species examined appear to have undertaken divergent strategies. *H.*  
286 *doris* seems to split the difference between the ‘right’ and ‘left’ clades in Figure 3 in allowing substantial

287 accumulation from both SINEs and LINES in the recent past while *H. burneyi* has restricted the proliferation  
288 of nearly all TEs without regard to class membership.

289         These observations suggest that there are substantial differences in the ways that each species deals  
290 with genomic stress caused by TE mobilization and that TE defense strategies diverge rapidly in each  
291 lineage. This is consistent with the model of piRNA clusters acting as TE ‘traps’ in which, upon an  
292 element’s insertion into a cluster, a piRNA-based defense against that element is mounted (Lu and Clark  
293 2010). As *Heliconius* butterflies diversified, different TEs would be expected to have fallen into piRNA  
294 traps evolving in each lineage, leading to different levels of response. This would yield clade-specific  
295 patterns similar to those observed here. With the detailed descriptions we have provided, this is a hypothesis  
296 that could eventually be tested.

297         SINEs are often the most numerous TEs in eukaryotes. For example, while LINES outstrip SINEs  
298 in the human genome by mass, the number of SINE insertions in our genomes surpasses LINES by an order  
299 of magnitude (Lander, et al. 2001). With such high copy numbers, SINEs are responsible for significant  
300 structural changes and therefore deserve special attention (Wang and Kirkness 2005). SINEs are also  
301 relatively short-lived residents of many genomes, often showing higher lineage-specificity when compared  
302 to their LINE partners. This pattern is observed in the present study as we can identify all three phases of a  
303 SINE life cycle, birth, expansion, and (potentially) death.

304         Examination of Metulj elements suggest an interesting history. Their unambiguous presence in all  
305 species makes it clear that they evolved in the common ancestor of Heliconiini. However, their recent  
306 expansion is restricted to only a subset of the taxa examined. This suggests lineage-specific mechanisms  
307 acting to either silence this family either through active mechanisms or via self-downregulation or through  
308 massive increases in SINE mobilization. Depicting the data as TE landscapes suggests a combination of  
309 these mechanisms (Figure 4). Applying the neutral substitution rate of Martin et al. (2016) to divergence  
310 values, one can see that all members of *Heliconius* and *E. tales* experienced a peak of Metulj activity ~25  
311 mya. This timing corresponds well with the time that a common ancestor of these species existed (Figure  
312 1). After the initial *Heliconius* divergence, all species exhibit a decline in TE accumulation as one moves  
313 toward the present, but this is followed by resurgences in all lineages with the exception of melpomene and  
314 silvaniforms. Indeed, the lack of variability in recent Metulj content (Figure 3) suggests a rapid cessation  
315 of activity in the common ancestor of these clades.

316         The reason for the death of Metulj in the latter clades is unclear, as is the cause of the resurgence  
317 in other species. Why any SINE goes extinct is unknown and could be influenced by multiple factors  
318 including genomic defenses, the partner LINE, mutations in the SINEs themselves, and population genetic  
319 processes. The evolution of new subfamilies requires mobilization of the elements. Thus, the lack of any

320 new subfamilies that are unique to this clade suggests a simple cessation of retrotransposition. If we are  
321 correct in our conclusion that RTE LINEs are responsible for Metulj mobilization, some clues may be found  
322 by examining those elements. One potential explanation is to view the SINE-LINE relationship not as a  
323 partnership but as a competition for the enzymatic machinery produced by LINEs. If the SINEs are  
324 particularly effective at hijacking that machinery, it may be possible for them to suppress LINE  
325 mobilization to some extent, even to the eventual demise of the LINE partner, as was recently hypothesized  
326 in sigmodontine rodents (Yang et al. pers. comm.). Our analysis of Metulj tails suggests that the ancestral  
327 tail of Metulj SINEs was A-rich and that a switch toward tails containing more T residues may be involved  
328 in the success of this SINE in the erato and sara clades. This hypothesis does not, however, hold true for *D.*  
329 *iulia*, *A. vanillae*, or *H. doris*, which have all experienced high rates of recent Metulj accumulation but  
330 exhibit a bias toward A nucleotides in their tails. These results suggest that the reasons for the differential  
331 success in heliconiine genomes may be many, and complex.

332 Not surprisingly, the outgroup species, with their deeper divergences, exhibit their own unique  
333 patterns. *D. iulia*, with the highest proportion of Metulj in its genome, experienced a recent surge in  
334 accumulation that outpaced any other heliconiine examined. *E. tales* mirrors the erato and sara clades while  
335 *A. vanillae* appears to have experienced a gradual increase in accumulation very recently.

336 Previous analyses (Lavoie, et al. 2013) suggested that larger TEs were removed via non-  
337 homologous recombination. This hypothesis is not refuted by our data. Examination of the TE landscape  
338 plots described above suggests that, unlike the pattern observed in mammalian genomes, where TEs remain  
339 as molecular fossils over large swaths of evolutionary time (Lander, et al. 2001; Waterston, et al. 2002),  
340 there is substantial turnover of TEs in these butterfly genomes. For example, when examining the temporal  
341 accumulation landscapes of Metulj, a SINE that averages well under 300 bp, we can readily see evidence  
342 of ancient accumulation (Figure 4). The LINE TE classes exhibit much less clear signatures: we rarely see  
343 ancient peaks in accumulation plots (Supplemental Figure 12). This suggests that these genomes can rapidly  
344 diverge over evolutionary time once reproductive isolation is acquired, with distinct lineages retaining little  
345 ancient TE-derived homology from larger elements across their genomes.

346 Assuming the phylogeny proposed by Kozak et al. (2015) and Edelman (submitted), the distribution  
347 of ZenoSINE elements is difficult to explain. The family is present at substantial numbers in *E. tales*, all  
348 members of the erato and sara clades, *H. doris*, and *H. burneyi*. Such a distribution could be explained by  
349 three scenarios. First is an ancient origin for the family in the common ancestor of the monophyletic group  
350 that includes *E. tales* and all members of *Heliconius* followed by not just a loss of activity in the melpomene  
351 and silvaniform clades but also by the removal of any previously existing insertions. The lack of any  
352 genuine ZenoSINEs (see Results) in these genomes makes the ancient origin hypothesis less likely.

353 Finally, it is possible that ZenoSINE evolved in only one of these lineages and this was followed  
354 by migration, either through horizontal transfer or hybridization, to the others. For example, one such  
355 scenario would be that this SINE evolved in the common ancestor of the erato and sara clades and managed  
356 to move to the other species in which it is found. Given the high tendency toward hybridization in the  
357 *Heliconius* clade overall (Mavarez, et al. 2006; Kronforst 2008; Heliconius 2012; Nadeau, et al. 2012), this  
358 seems the most plausible scenario but horizontal transfer, given that it could be a common phenomenon in  
359 insects (Peccoud, et al. 2017) cannot be ruled out.

360 Rates of TE origination in Heliconiini follow some expected patterns. *D. iulia*, with the longest  
361 branch on the tree has the highest fraction of branch-specific TEs (Table 2). This would be expected given  
362 a relatively constant rate of TE origination and the ancient divergence that it represents. However,  
363 examination of *Heliconius* suggests that TE origination rates are not uniform along the tree. Instead, there  
364 is a burst of TE evolution during the early stages of *Heliconius* diversification, in particular on the branch  
365 leading to the melpomene and silvaniform subclades, which spans a period ranging from ~7 – 3 mya. This  
366 corresponds well with the findings of Kozak et al. who identified a rapid increase in species diversification  
367 during the same period (Kozak, et al. 2015). Those authors proposed that environmental perturbation  
368 allowed for the invasion of new niches. This also corresponds with the periods of extensive cross-lineage  
369 hybridization found by Edelman et al. Collectively, this suggests that TEs may have been shuffled between  
370 lineages during this time. Such mixing could lead to “mismatching” in TE content vs. TE defense machinery  
371 and subsequently permitted the extensive accumulation of different TEs in different lineages. While we do  
372 not yet have data to support such a scenario, similar mismatches have been shown to play a role in  
373 *Drosophila* reproductive isolation (Petrov, et al. 1995).

374 TEs have been shown to respond to environmental stressors, thereby leading to substantial genomic  
375 instability (Rey, et al. 2016). Such instability has the potential, in turn, to provide novel genotypes and  
376 phenotypes upon which selection can act, either through direct changes to coding regions (Clark, et al.  
377 2006) or through perturbations of gene regulatory pathways (Chuong, et al. 2016, 2017; Trizzino, et al.  
378 2017). We suggest that the geologic and climatic upheaval described for this period (Gregory-Wodzicki  
379 2000; Hoon, et al. 2010; Jaramillo, et al. 2010; Rull 2011; Blandin and Purser 2013), may have set this  
380 cascade into motion in Heliconiini. Indeed, one recent study found that regulatory elements that differed  
381 between the sister species *H. erato* and *H. himera* were enriched for LINE content (Lewis and Reed 2018),  
382 suggesting an impact by LINES on regulatory innovation.

383 Regardless, the observations presented here make it clear that differential TE activity and  
384 accumulation can act as a driver of rapid genomic divergence. Similar analyses of multiple taxa have been  
385 performed for other groups including squamates and birds (Kapusta and Suh 2017; Pasquesi, et al. 2018).  
386 In those studies, especially the squamates, similar shifts in TE content and accumulation were observed.

387 However, those analyses examined much deeper divergences than the ones examined here. Thus, one might  
388 expect to observe more drastic changes because of the longer evolutionary time spans. In examining much  
389 more closely related lineages, we demonstrate that even over relatively short periods, the TE landscapes in  
390 members of a single genus can diverge rapidly due to differential TE dynamics. Lineages whose common  
391 ancestor harbored a single complement of TEs now play host to very distinctive complements of recently  
392 active TEs with patterns that resemble genomic fingerprints. Even in the case of LTR accumulation, where  
393 no significant difference exists with regard to overall accumulation amounts, the identities of the elements  
394 that have accumulated are quite distinct. Such distinctions are true of all classes. This is exemplified by our  
395 observation that on average ~23 Mb (5.3-9.2%, depending on genome size) of the genomes of the  
396 melpomene and sylvaniforms subclades harbor TE-derived DNA that would not be found in members of  
397 erato and sara. In *D. iulia*, a full 15% (85.2 Mb) of the genome is uniquely TE-derived in that lineage when  
398 compared to any other species we examined. The data make it clear that novel TE families, such as  
399 ZenoSINE and Julian, can arise and replicate rapidly to occupy substantial genome fractions in isolated  
400 lineages. Furthermore, because these genomes tend to actively remove longer TEs, the ancestral fractions  
401 of each genome will change rapidly as different portions are removed in each lineage.

402 This purely structural component of genome evolution, when combined with the functional impacts  
403 of TEs as they contribute new open reading frames, regulatory sites, and small RNAs add support to the  
404 contention that TEs are major drivers of genome evolution and deserve significant attention when  
405 determining the forces that lead to the taxonomic and phenotypic diversity around us.

406 These results also suggest powerful ways to move forward in understanding the forces that act to  
407 regulate TE activity. Here, we provide what amounts to a ‘natural history’ of TEs content in the genomes  
408 of 19 relatively closely related species. Researchers interested in how small RNAs and their protein partners  
409 act to suppress the damage of TEs now have a detailed starting point from which to begin detailed studies.

## 410 **Materials and Methods**

### 411 *TE discovery and Classification:*

412 De novo TE discovery was implemented using a combination of RepeatMasker (Smit, et al. 2013-  
413 2015), RepeatModeler (Smit and Hubley 2008-2010), and manual annotation as described in Platt et al.  
414 (2016) with some modification. Briefly, each genome assembly was sorted by scaffold length and the top  
415 ~200 Mb were used as the base for our analysis. Each genome fragment was then subjected to a  
416 RepeatModeler analysis and a de novo repeat library was generated. Each genome fragment was then  
417 masked using its de novo library. RepeatMasker output was processed using a custom Perl script to calculate  
418 K2P distances for each insertion.

419           Because our primary interest is in lineage-specific insertion patterns, we sorted insertions by K2P  
420 distance from their respective consensus sequence and selected only insertions that were likely to be recent.  
421 K2P distance cutoff values were determined using information from the phylogeny of Kozak et al. (2015).  
422 For example, several subgroups are evident from the phylogeny in Figure 1. Three species form a relatively  
423 deeply diverged set of outgroup taxa, *A. vanillae*, *D. iulia*, and *E. tales*. Because of the longer branch  
424 lengths, these species are likely to harbor older but still lineage-specific insertions compared to species in  
425 the more recently diversified clades. We therefore examined any insertions with divergences  $<0.2$  in the  
426 outgroups. Similarly, we used reduced cutoffs for members of the other three groups (i.e. divergences  $<0.1$   
427 for members of the doris and wallacei clades and  $<0.05$  for members of the erato, sara, melpomene, and  
428 sylvaniform clades).

429           Manual validation of putative repeats discovered by RepeatModeler was performed as described in  
430 Platt et al. (2016) by using them as queries against a combined ‘pseudogenome’ consisting of a  
431 concatenation of each 200 Mb fragment draft with BLASTn v2.2.27 (Altschul, et al. 1990). Repeats with  
432 fewer than ten hits were discarded from downstream analyses. For all remaining queries, the top hits (up to  
433 40) were extracted with at least 500 bases of flanking sequence and aligned with the query using MUSCLE  
434 v3.8.1551 (Edgar 2004). Majority rule consensus sequences were generated in BioEdit v7.2.5 (Hall 1999)  
435 and manually edited to confirm gaps and ambiguous bases. 5’ and 3’ ends were examined for single copy  
436 DNA, indicating element boundaries. If no single copy DNA was identifiable, the new consensus was  
437 subjected to new iterations until boundaries were detected. After each round, new consensus sequences  
438 were subjected to a consolidation check using cd-hit-est (Li and Godzik 2006) to identify consensus  
439 sequences that could be combined. Criteria for collapsing two or more consensus sequences were 90%  
440 identity over at least 90% of their total length.

441           Broad categories of TE (i.e. DNA transposons, rolling circle transposons (RC), LINEs, SINEs, LTR  
442 elements, and unknown) were determined using a combination of BLAST searches of the NCBI database  
443 and CENSOR searches of Repbase (Jurka, et al. 2005; Kohany, et al. 2006). We also used structural criteria  
444 as follows: for DNA transposons, only elements with visible terminal inverted repeats were retained. For  
445 rolling circle transposons we required elements to have an identifiable ACTAG at one end. Putative novel  
446 SINEs were inspected for a repetitive tail and A and B boxes. LTR retrotransposons were required to have  
447 recognizable hallmarks such as TG, TGT or TGTT at their 5’ and the inverse at the 3’ ends. Because of the  
448 complexity of SINE evolution, putative SINEs were analyzed uniquely as described below. While  
449 sequences in the unknown category could be transposable elements, they formed only a very small fraction  
450 of the total putative TE sequence, and they could also represent segmental duplications or other non-TE  
451 species. Our interest was in the TE dynamics in these genomes, thus, these were ignored in most



452 downstream analysis. All other categories were checked for high similarity to known TEs and to one another  
453 using a final combined run of cd-hit-est using the same criteria as previous.

454 *SINEs*:

455 SINE evolution is complex and identifying subfamily structure is a difficult problem, primarily due  
456 to the high number of insertions typical of a genome. Initial analysis suggested three SINE families in these  
457 genomes. The first is the previously described Metulj family. The second is a novel family that appears to  
458 be derived from the fusion of Zenon LINE 3' tails with a 5' head of unknown origin, which we call  
459 ZenoSINE. A small subfamily distinct from the main ZenoSINE family was identified in and restricted to  
460 the *A. vanillae* genome *A. vanillae* is commonly known as the Gulf Fritillary. Thus, we dubbed this  
461 subfamily 'Fritillar'. Finally, a third family that is derived from R1 elements is restricted to *D. iulia*. One  
462 common moniker for this species is 'flambeau' and we suggest the same name, Flambeau, for this family  
463 of SINEs.

464 Metulj SINEs were far more numerous and widespread than their ZenoSINE cousins (discussed  
465 below), and therefore represented a more difficult analytical problem. A recently developed network-based  
466 method for subfamily (aka community) detection was used to identify Metulj subfamilies (Levy, et al.  
467 2017). Briefly, similarity networks were constructed by pairwise-aligning Metulj elements >240  
468 nucleotides long ( $n = 498,141$ ) from all 19 butterfly genomes using BLAST. Further preprocessing was  
469 performed to prevent possible biases caused by sequence length and shared poly(A/T) tails that may  
470 confound community detection. For this step, previously identified Metulj consensus sequences were  
471 aligned using MUSCLE and 5' and 3' overhangs were manually trimmed using Bioedit. Genomic Metulj  
472 sequences were aligned to these trimmed consensus sequences using BLAST+ to identify corresponding  
473 regions (parameters: *-strand plus -max\_target\_seqs 3 -num\_threads 20 -word\_size 4 -evalue 1e-2 -dust no*  
474 *-soft\_masking false*). Minimum start and maximum end positions define the region for further analysis per  
475 sequence and were length-filtered for  $\geq 235$  nucleotides. The 420,689 sequences retained were analyzed  
476 for subfamily detection: the sequences were pairwise aligned using BLAST (version 2.7.1+; blastn  
477 command was used with non-default parameters: *-strand plus -dust no -max\_target\_seqs 50 -word\_size 8*  
478 *-soft\_masking false*). Bornholdt community detection (Reichardt and Bornholdt 2006) was applied using  
479  $\gamma=59$ . Consensus sequences were computed using MUSCLE with 30 randomly selected sequences  
480 per community (with max of 2 iterations). To further refine subfamily definitions, communities with  
481 identical consensus sequences were merged (such pairs were identified using BLAST requiring 100%  
482 identity and 95% query coverage). Consensus sequences were computed per subfamily and were used to  
483 refine the subfamily annotation, resulting in a final set of 2,493 subfamilies (Supplemental File 2). This set  
484 was further grouped into 147 clusters to simplify downstream analyses using cd-hit-est. Clustering criterion  
485 was 95% identity, comparing the entire length of the SINEs

486 *LINEs:*

487 Previous analyses (Lavoie, et al. 2013) suggest that longer TEs are more likely to be fragmented  
488 by non-homologous recombination. As a result, we focused on the LINE open reading frame to increase  
489 the potential for comparable data. A special effort was made to identify full- or near full-length open reading  
490 frames (ORFs) for each clade. First, we identified all known LINE elements from the *H. melpomene*  
491 genome in RepBase. These were combined with any LINEs identified in our de novo analysis after  
492 removing possible duplicates. All remaining elements were filtered, retaining any with intact ORFs of at  
493 least 2kb, starting with methionine, and with clearly identifiable start and stop codons using ‘getorf’ from  
494 the EMBOSS package (Rice, et al. 2000).

495 To identify subfamily structure of LINEs, phylogenetic analysis of these ORFs was accomplished  
496 by masking each genome with the resulting library and retaining any hits of 1.5kb or longer. Generally,  
497 extracted hits were aligned using MUSCLE and subjected to a neighbor-joining (NJ) analysis (described  
498 below). However, large numbers of hits impeded efficient alignment in some cases due to memory  
499 limitations. To work around this problem, we reduced the number of hits by randomly selecting smaller  
500 numbers of sequences from the pool and re-aligning until successful. In some of these cases, there was a  
501 lack of overlapping sites that impeded the NJ analysis. In these cases, we extended our filter to include hits  
502 that were at least 2kb, producing the needed overlapping regions.

503 Each set of aligned ORFs was subjected to NJ analysis to identify any apparent structure. NJ  
504 analyses were accomplished based on the maximum composite likelihood parameters in MEGA7 (Kumar,  
505 et al. 2016) with pairwise deletion of ambiguous positions and 500 bootstrap replicates. Trees were  
506 examined visually and clearly delineated clades with high bootstrap support were labeled as subfamilies  
507 using letter designations (Supplemental File 2 and Supplemental Figure 13). For example, examination of  
508 the RTE-4\_Hmel tree yielded four subfamilies, RTE-4\_Hmel\_A-D (Supplemental Figure 13).

509 To estimate genetic distances among members of each subfamily, we used a combination of tools  
510 via a custom script that would first align the hits identified for each subfamily using MUSCLE. The script  
511 would then invoke trimal (-gt 0.6 -cons 60 -fasta) to trim the alignment (Capella-Gutierrez, et al. 2009) and  
512 use ‘cons’ from the EMBOSS package to generate a consensus sequences (-plurality 3 -identity 3). We then  
513 used MEGA7 to calculate mean divergence from the consensus, mean divergence among subfamily  
514 members, and divergence ranges (Supplemental File 3).

515 *Recent vs. Ancient Taxonomic Distributions:*

516 To determine taxonomic distributions for each class, family, and subfamily, we used RepeatMasker  
517 and custom python scripts to generate proportion tables as follows. RepeatMasker was used to identify  
518 insertions in each of the 19 genomes, this time using the entire genome drafts. Hits with divergences <0.05

519 from their respective consensus sequences were considered ‘recent’ and  $>0.05$  as ‘old’. For each TE  
520 (separated by names, class, or family, depending on the level of analysis), total base coverage was calculated  
521 and divided by the total genome size to give a proportion.

522 To illustrate differences among *Heliconius spp.* In terms of TE composition, we imposed a principal  
523 components (PC) analysis on a species-by-element matrix each for DNA transposons, LRT transposons,  
524 SINE’s and LINE’s. To illustrate similarities and differences among Heliconiini, we displayed their  
525 positions based on the first two principal components. Species that are proximate in this two-dimensional  
526 space have more similar TE composition than species that are more distant. To illustrate how species  
527 differed based on their TE composition, we displayed the correlation of each individual element type (e.g.  
528 those with unique names) with the first and second PC.

529 *SINE/LINE partnerships:*

530 SINEs and LINEs have a host-parasite relationship with SINEs, in which SINEs will hijack the  
531 enzymatic machinery encoded by their partner LINE to mobilize (Kajikawa and Okada 2002; Roy-Engel,  
532 et al. 2002; Dewannieux, et al. 2003). Such partnerships are often defined by a shared 3’ tail (Ohshima and  
533 Okada 2005). We examined the 3’ ~100 bp of each SINE and queried the 3’ ends of all LINEs in our new  
534 TE database to determine the likely LINE partner for each.

535 The 3’ tails of Metulj elements exhibited substantial complexity, with a variety of structures  
536 including poly-A tracts, poly-T tracts, repeated ATTTA motifs, and repeated GATG motifs, among several  
537 others. Based on previous work, we suspected that differences in the tail may influence relative success in  
538 retrotransposition (Dewannieux and Heidmann 2005; Ohshima and Okada 2005). To investigate how tail  
539 structure evolved, we extracted 100 random full-length Metulj insertions from each taxon. Each set of  
540 extracts was aligned to representative consensus sequences. This was repeated ten times for each taxon.  
541 The 3’ ends of each alignment were degapped starting where the tail begins and the ratios of each pair of  
542 nucleotides was identified and plotted after log-transformation. This was conducted separately for ‘old’ and  
543 ‘young’ SINEs.

544 To determine if either Metulj or ZenoSINE accumulation patterns were correlated with any LINE  
545 elements, Pearson correlation coefficients based on proportion of each genome occupied were visualized  
546 using the “corrplot” package in R and RStudio v1.0.143.

547 *TE origination rates:*

548 To estimate approximate rates that lineages evolved new TE lineages, we calculated the number of  
549 branch-specific TEs using RepeatMasker output. A TE was scored as ‘present’ (score = 1) in a genome if  
550 at least 5000 bp of sequence attributable to that TE was identifiable in the genomes of terminal branches.  
551 A TE was considered ‘absent’ (score = 0) if fewer than 500 bp was identified. To score subclades, we

552 allowed ‘possible presence’ scores of 0.5 if base counts fell between the two values. Subclade ‘presence’  
553 sum threshold scores were subclade specific based on the number of species examined. For example, the  
554 erato subclade, with four members, had a presence sum threshold of 3.5. Branch times were obtained using  
555 the median scores for each node calculated using TimeTree (Kumar, et al. 2017). Rates of TE origination  
556 were calculated by dividing the number of branch-specific insertions by the time that the branch likely  
557 existed.

558 We estimated lineage-specific DNA contributions to selected branches of the tree by identifying  
559 DNA that was deposited by novel TEs that evolved on those branches. We then calculated both the genome  
560 proportions occupied by those elements and the total bp. For example, we summed the total contributions  
561 made by each of the 118 novel TEs identified in the *D. iulia* genome (Table 2). Similarly, we summed total  
562 the total bp deposited by each novel TE identified on the erato-sara common branch in each member of  
563 those clades and calculated the mean (Supplemental File 1).

#### 564 *Genome size correlations:*

565 Using the annotations generated, we compiled summary statistics of transposable element content  
566 in each heliconiine genome, in terms of TE bases per base pair (TE length) and number of insertions per  
567 base pair (TE count). We obtained genome size estimates from Edelman *et al.* (submitted). Because the  
568 absolute values of these measures are several orders of magnitude apart, we Z-transformed each category  
569 by subtracting the mean and dividing by the standard deviation.

#### 570 **Acknowledgments**

571 The authors wish to thank the College of Arts and Sciences at Texas Tech University for funding  
572 related to this work. In addition, we would like to thank the Texas Tech HPCC  
573 (<http://www.depts.ttu.edu/hpcc/>) for providing computational resources necessary to complete this  
574 project. Angela Peace provided assistance with early conceptual analyses. The 20-genome *Heliconius*  
575 project was funded by a SPARC Grant from the Broad Institute of Harvard and MIT as well as startup and  
576 studentship funds from Harvard University.

577

578

579 **References**

- 580 Altschul SF, Gish W, Miller W, Myers EW, Lipman DJ. 1990. Basic local alignment search tool. *Journal*  
581 *of Molecular Biology* 215:403-410.
- 582 Arias CF, Giraldo N, Mcmillan WO, Lamas G, Jiggins CD, Salazar C. 2017. A new subspecies in a  
583 *Heliconius* butterfly adaptive radiation (Lepidoptera: Nymphalidae). *Zoological Journal of the Linnean*  
584 *Society* 180:805-818.
- 585 Blandin P, Purser B. 2013. Evolution and diversification of Neotropical butterflies: Insights from the  
586 biogeography and phylogeny of the genus *Morpho* Fabricius, 1807 (Nymphalidae: Morphinae), with a  
587 review of the geodynamics of South America. *Tropical Lepidoptera Research* 23:62-85.
- 588 Capella-Gutierrez S, Silla-Martinez JM, Gabaldon T. 2009. trimAl: a tool for automated alignment  
589 trimming in large-scale phylogenetic analyses. *Bioinformatics* 25:1972-1973.
- 590 Carbone L, Harris RA, Gnerre S, Veeramah KR, Lorente-Galdos B, Huddleston J, Meyer TJ, Herrero J,  
591 Roos C, Aken B, et al. 2014. Gibbon genome and the fast karyotype evolution of small apes. *Nature*  
592 513:195-+.
- 593 Chuong EB, Elde NC, Feschotte C. 2017. Regulatory activities of transposable elements: from conflicts  
594 to benefits. *Nature Reviews Genetics* 18:71-86.
- 595 Chuong EB, Elde NC, Feschotte C. 2016. Regulatory evolution of innate immunity through co-option of  
596 endogenous retroviruses. *Science* 351:1083-1087.
- 597 Clark LA, Wahl JM, Rees CA, Murphy KE. 2006. Retrotransposon insertion in *SILV* is responsible for  
598 merle patterning of the domestic dog. *Proceedings of the National Academy of Sciences of the United*  
599 *States of America* 103:1376-1381.
- 600 Dewannieux M, Esnault C, Heidmann T. 2003. LINE-mediated retrotransposition of marked Alu  
601 sequences. *Nature Genetics* 35:41-48.
- 602 Dewannieux M, Heidmann T. 2005. Role of poly(A) tail length in Alu retrotransposition. *Genomics*  
603 86:378-381.
- 604 Edgar RC. 2004. MUSCLE: multiple sequence alignment with high accuracy and high throughput.  
605 *Nucleic Acids Research* 32:1792-1797.
- 606 Ellison CE, Bachtrog D. 2013. Dosage compensation via transposable element mediated rewiring of a  
607 regulatory network. *Science* 342:846-850.
- 608 Grabundzija I, Messing SA, Thomas J, Cosby RL, Bilic I, Miskey C, Gogol-Doring A, Kapitonov V,  
609 Diem T, Dalda A, et al. 2016. A Helitron transposon reconstructed from bats reveals a novel mechanism  
610 of genome shuffling in eukaryotes. *Nat Commun* 7.
- 611 Gray YH. 2000. It takes two transposons to tango: transposable-element-mediated chromosomal  
612 rearrangements. *Trends in Genetics* 16:461-468.

- 613 Gregory-Wodzicki KM. 2000. Uplift history of the Central and Northern Andes: A review Geological  
614 Society of America Bulletin 112:1091-1105.
- 615 Hall TA. 1999. BioEdit: a user-friendly biological sequence alignment editor and analysis program for  
616 Windows 95/98/NT. Nucleic Acids Symposium Series 41:95-98.
- 617 Hedges DJ, Deininger PL. 2007. Inviting instability: Transposable elements, double-strand breaks, and  
618 the maintenance of genome integrity. Mutation Research-Fundamental and Molecular Mechanisms of  
619 Mutagenesis 616:46-59.
- 620 Heliconius GC. 2012. Butterfly genome reveals promiscuous exchange of mimicry adaptations among  
621 species. Nature 487:94-98.
- 622 Hoorn C, Wesselingh FP, ter Steege H, Bermudez MA, Mora A, Sevink J, Sanmartín I, Sanchez-  
623 Meseguer A, Anderson CL, Figueiredo JP, et al. 2010. Amazonia through time: Andean uplift, climate  
624 change, landscape evolution, and biodiversity. Science 330:927-931.
- 625 Hubley R, Finn RD, Clements J, Eddy SR, Jones TA, Bao WD, Smit AFA, Wheelers TJ. 2016. The Dfam  
626 database of repetitive DNA families. Nucleic Acids Research 44:D81-D89.
- 627 Jacques PE, Jeyakani J, Bourque G. 2013. The majority of primate-specific regulatory sequences are  
628 derived from transposable elements. PLoS Genet 9:e1003504.
- 629 Jaramillo C, Hoorn C, Silva SAF, Leite F, Herrera F, Quiroz L, Rodolfo D, Antonioni L. 2010. The origin  
630 of the modern Amazon rainforest: implications of the palynological and palaeobotanical record. In:  
631 Hoorn C, Wesselingh FP, editors. Amazonia, landscape and species evolution: a look into the past.  
632 Oxford: Blackwell. p. 317-334.
- 633 Jurka J, Bao W, Kojima KK. 2011. Families of transposable elements, population structure and the origin  
634 of species. Biol Direct 6:44.
- 635 Jurka J, Bao W, Kojima KK, Kohany O, Yurka MG. 2012. Distinct groups of repetitive families  
636 preserved in mammals correspond to different periods of regulatory innovations in vertebrates. Biol  
637 Direct 7:36.
- 638 Jurka J, Kapitonov VV, Pavlicek A, Klonowski P, Kohany O, Walichiewicz J. 2005. Repbase Update, a  
639 database of eukaryotic repetitive elements. Cytogenetic and Genome Research 110:462-467.
- 640 Kajikawa M, Okada N. 2002. LINEs mobilize SINEs in the eel through a shared 3' sequence. Cell  
641 111:433-444.
- 642 Kapusta A, Suh A. 2017. Evolution of bird genomes-a transposon's-eye view. Annals of the New York  
643 Academy of Sciences 1389:164-185.
- 644 Kapusta A, Suh A, Feschotte C. 2017. Dynamics of genome size evolution in birds and mammals.  
645 Proceedings of the National Academy of Sciences of the United States of America 114:E1460-E1469.
- 646 Kazazian HH, Jr. 2004. Mobile elements: drivers of genome evolution. Science 303:1626-1632.



647 Kidwell MG, Lisch D. 1997. Transposable elements as sources of variation in animals and plants.  
648 Proceedings of the National Academy of Sciences of the United States of America 94:7704-7711.

649 Kohany O, Gentles AJ, Hankus L, Jurka J. 2006. Annotation, submission and screening of repetitive  
650 elements in Repbase: RepbaseSubmitter and Censor. BMC Bioinformatics 7:474.

651 Koonin EV. 2016a. Horizontal gene transfer: essentiality and evolvability in prokaryotes, and roles in  
652 evolutionary transitions. F1000Res 5.

653 Koonin EV. 2016b. Viruses and mobile elements as drivers of evolutionary transitions. Philos Trans R  
654 Soc Lond B Biol Sci 371.

655 Kozak KM, Wahlberg N, Neild AFE, Dasmahapatra KK, Mallet J, Jiggins CD. 2015. Multilocus Species  
656 Trees Show the Recent Adaptive Radiation of the Mimetic Heliconius Butterflies. Systematic Biology  
657 64:505-524.

658 Kronforst MR. 2008. Gene flow persists millions of years after speciation in Heliconius butterflies. BMC  
659 Evol Biol 8:98.

660 Kumar S, Stecher G, Suleski M, Hedges SB. 2017. TimeTree: A Resource for Timelines, Timetrees, and  
661 Divergence Times. Molecular Biology and Evolution 34:1812-1819.

662 Kumar S, Stecher G, Tamura K. 2016. MEGA7: Molecular Evolutionary Genetics Analysis Version 7.0  
663 for Bigger Datasets. Molecular Biology and Evolution 33:1870-1874.

664 Lamichhaney S, Berglund J, Almen MS, Maqbool K, Grabherr M, Martinez-Barrio A, Promerova M,  
665 Rubin CJ, Wang C, Zamani N, et al. 2015. Evolution of Darwin's finches and their beaks revealed by  
666 genome sequencing. Nature 518.

667 Lander ES, Linton LM, Birren B, Nusbaum C, Zody MC, Baldwin J, Devon K, Dewar K, Doyle M,  
668 FitzHugh W, et al. 2001. Initial sequencing and analysis of the human genome. Nature 409:860-921.

669 Lavoie CA, Platt RN, Novick PA, Counterman BA, Ray DA. 2013. Transposable element evolution in  
670 Heliconius suggests genome diversity within Lepidoptera. Mob DNA 4.

671 Levy O, Knisbacher BA, Levanon EY, Havlin S. 2017. Integrating networks and comparative genomics  
672 reveals retroelement proliferation dynamics in hominid genomes. Science Advances 3.

673 Lewis JJ, Reed RD. 2018. Genome-wide regulatory adaptation shapes population-level genomic  
674 landscapes in Heliconius. Molecular Biology and Evolution.

675 Li WZ, Godzik A. 2006. Cd-hit: a fast program for clustering and comparing large sets of protein or  
676 nucleotide sequences. Bioinformatics 22:1658-1659.

677 Lim JK, Simmons MJ. 1994. Gross chromosome rearrangements mediated by transposable elements in  
678 Drosophila melanogaster. Bioessays 16:269-275.

679 Lu J, Clark AG. 2010. Population dynamics of PIWI-interacting RNAs (piRNAs) and their targets in  
680 Drosophila. Genome Research 20:212-227.

- 681 Martin SH, Most M, Palmer WJ, Salazar C, McMillan WO, Jiggins FM, Jiggins CD. 2016. Natural  
682 Selection and Genetic Diversity in the Butterfly *Heliconius melpomene*. *Genetics* 203:525-+.
- 683 Mavarez J, Salazar CA, Bermingham E, Salcedo C, Jiggins CD, Linares M. 2006. Speciation by  
684 hybridization in *Heliconius* butterflies. *Nature* 441:868-871.
- 685 McClintock B. 1956. Controlling Elements and the Gene. *Cold Spring Harbor Symposia on Quantitative*  
686 *Biology* 21:197-216.
- 687 McClintock B. 1984. The Significance of Responses of the Genome to Challenge. *Science* 226:792-801.
- 688 Mita P, Boeke JD. 2016. How retrotransposons shape genome regulation. *Current Opinion in Genetics &*  
689 *Development* 37:90-100.
- 690 Nadeau NJ, Whibley A, Jones RT, Davey JW, Dasmahapatra KK, Baxter SW, Quail MA, Joron M,  
691 French-Constant RH, Blaxter ML, et al. 2012. Genomic islands of divergence in hybridizing *Heliconius*  
692 butterflies identified by large-scale targeted sequencing. *Philos Trans R Soc Lond B Biol Sci* 367:343-  
693 353.
- 694 Nater A, Burri R, Kawakami T, Smeds L, Ellegren H. 2015. Resolving Evolutionary Relationships in  
695 Closely Related Species with Whole-Genome Sequencing Data. *Systematic Biology* 64:1000-1017.
- 696 Ohshima K, Okada N. 2005. SINEs and LINEs: symbionts of eukaryotic genomes with a common tail.  
697 *Cytogenetic and Genome Research* 110:475-490.
- 698 Oliver KR, Greene WK. 2011. Mobile DNA and the TE-Thrust hypothesis: supporting evidence from the  
699 primates. *Mob DNA* 2:8.
- 700 Oliver KR, Greene WK. 2012. Transposable elements and viruses as factors in adaptation and evolution:  
701 an expansion and strengthening of the TE-Thrust hypothesis. *Ecol Evol* 2:2912-2933.
- 702 Pasquesi GIM, Adams RH, Card DC, Schield DR, Corbin AB, Perry BW, Reyes-Velasco J, Ruggiero RP,  
703 Vandeweghe MW, Shortt JA, et al. 2018. Squamate reptiles challenge paradigms of genomic repeat  
704 element evolution set by birds and mammals. *Nat Commun* 9:2774.
- 705 Peccoud J, Loiseau V, Cordaux R, Gilbert C. 2017. Massive horizontal transfer of transposable elements  
706 in insects. *Proceedings of the National Academy of Sciences of the United States of America* 114:4721-  
707 4726.
- 708 Petrov DA, Schutzman JL, Hartl DL, Lozovskaya ER. 1995. Diverse Transposable Elements Are  
709 Mobilized in Hybrid Dysgenesis in *Drosophila-Virilis*. *Proceedings of the National Academy of Sciences*  
710 *of the United States of America* 92:8050-8054.
- 711 Platt RN, 2nd, Blanco-Berdugo L, Ray DA. 2016. Accurate Transposable Element Annotation Is Vital  
712 When Analyzing New Genome Assemblies. *Genome Biology and Evolution* 8:403-410.
- 713 Rebollo R, Horard B, Hubert B, Vieira C. 2010. Jumping genes and epigenetics: Towards new species.  
714 *Gene* 454:1-7.

- 715 Rebollo R, Romanish MT, Mager DL. 2012. Transposable Elements: An Abundant and Natural Source of  
716 Regulatory Sequences for Host Genes. *Annual Review of Genetics*, Vol 46 46:21-42.
- 717 Reichardt J, Bornholdt S. 2006. Statistical mechanics of community detection. *Phys Rev E Stat Nonlin*  
718 *Soft Matter Phys* 74:016110.
- 719 Rey O, Danchin E, Mirouze M, Loot C, Blanchet S. 2016. Adaptation to Global Change: A Transposable  
720 Element-Epigenetics Perspective. *Trends Ecol Evol* 31:514-526.
- 721 Rice P, Longden I, Bleasby A. 2000. EMBOSS: The European molecular biology open software suite.  
722 *Trends in Genetics* 16:276-277.
- 723 Roy-Engel AM, Salem AH, Oyeniran OO, Deininger L, Hedges DJ, Kilroy GE, Batzer MA, Deininger  
724 PL. 2002. Active *Alu* element "A-tails": size does matter. *Genome Research* 12:1333-1344.
- 725 Rull V. 2011. Neotropical biodiversity: timing and potential drivers. *Trends Ecol Evol* 26:508-513.
- 726 RepeatModeler Open-1.0. 2008-2010 [Internet]. 2008-2010. Available from:  
727 <http://www.repeatmasker.org>
- 728 Repeatmasker at <http://repeatmasker.org> [Internet]. 2013-2015.
- 729 Sundaram V, Cheng Y, Ma ZH, Li DF, Xing XY, Edge P, Snyder MP, Wang T. 2014. Widespread  
730 contribution of transposable elements to the innovation of gene regulatory networks. *Genome Research*  
731 24:1963-1976.
- 732 Sundaram V, Choudhary MNK, Pehrsson E, Xing XY, Fiore C, Pandey M, Maricque B, Udawatta M,  
733 Ngo D, Chen YJ, et al. 2017. Functional cis-regulatory modules encoded by mouse-specific endogenous  
734 retrovirus. *Nat Commun* 8.
- 735 Supple M, Papa R, Counterman B, McMillan WO. 2014. The Genomics of an Adaptive Radiation:  
736 Insights Across the *Heliconius* Speciation Continuum. *Ecological Genomics: Ecology and the Evolution*  
737 *of Genes and Genomes* 781:249-271.
- 738 Supple MA, Hines HM, Dasmahapatra KK, Lewis JJ, Nielsen DM, Lavoie C, Ray DA, Salazar C,  
739 McMillan WO, Counterman BA. 2013. Genomic architecture of adaptive color pattern divergence and  
740 convergence in *Heliconius* butterflies. *Genome Research* 23:1248-1257.
- 741 Talla V, Suh A, Kalsoom F, Dinca V, Vila R, Friberg M, Wiklund C, Backstrom N. 2017. Rapid Increase  
742 in Genome Size as a Consequence of Transposable Element Hyperactivity in Wood-White (*Leptidea*)  
743 Butterflies. *Genome Biology and Evolution* 9:2491-2505.
- 744 Trizzino M, Park Y, Holsbach-Beltrame M, Aracena K, Mika K, Caliskan M, Perry GH, Lynch VJ,  
745 Brown CD. 2017. Transposable elements are the primary source of novelty in primate gene regulation.  
746 *Genome Research* 27:1623-1633.
- 747 Wang W, Kirkness EF. 2005. Short interspersed elements (SINEs) are a major source of canine genomic  
748 diversity. *Genome Research* 15:1798-1808.

749 Waterston RH, Lindblad-Toh K, Birney E, Rogers J, Abril JF, Agarwal P, Agarwala R, Ainscough R,  
750 Alexandersson M, An P, et al. 2002. Initial sequencing and comparative analysis of the mouse genome.  
751 Nature 420:520-562.  
752 Zeh DW, Zeh JA, Ishida Y. 2009. Transposable elements and an epigenetic basis for punctuated  
753 equilibria. Bioessays.  
754  
755

756 **Tables:**

757 Table 1. Total numbers of SINE insertions >100 bp present from each family described in the 19 genomes  
 758 examined. Color coding indicates relative counts, darker green depicts higher numbers in each category.

| Taxon        | Counts    |          |           |        |        |          |
|--------------|-----------|----------|-----------|--------|--------|----------|
|              | Brushfoot | Flambeau | Fritillar | Julian | Metulj | ZenoSINE |
| <b>dlul</b>  | 385       | 134      | 10        | 16505  | 555536 | 16907    |
| <b>aVan</b>  | 13        | 3        | 1248      | 4      | 172584 | 80       |
| <b>eTal</b>  | 21        | 0        | 7         | 12     | 429689 | 11618    |
| <b>hTel</b>  | 7         | 8        | 0         | 2      | 301411 | 6405     |
| <b>hEcal</b> | 2         | 4        | 1         | 0      | 261271 | 4172     |
| <b>hHim</b>  | 6         | 8        | 0         | 0      | 280969 | 1492     |
| <b>hEra</b>  | 0         | 0        | 0         | 0      | 266446 | 1440     |
| <b>hDem</b>  | 4         | 0        | 0         | 0      | 248026 | 2012     |
| <b>hSar</b>  | 0         | 1        | 0         | 0      | 231573 | 9139     |
| <b>hDor</b>  | 14        | 0        | 0         | 0      | 250770 | 30999    |
| <b>hBur</b>  | 15        | 0        | 0         | 1      | 243679 | 11912    |
| <b>hMel</b>  | 2         | 0        | 0         | 0      | 147575 | 7        |
| <b>hCyd</b>  | 5         | 0        | 0         | 0      | 172064 | 18       |
| <b>hTim</b>  | 3         | 0        | 0         | 0      | 135749 | 15       |
| <b>hNum</b>  | 4         | 0        | 0         | 0      | 200506 | 14       |
| <b>hBes</b>  | 5         | 0        | 0         | 0      | 160502 | 25       |
| <b>hEca</b>  | 6         | 1        | 0         | 0      | 204966 | 28       |
| <b>hEle</b>  | 10        | 1        | 0         | 0      | 266629 | 32       |
| <b>hPar</b>  | 6         | 0        | 0         | 0      | 232673 | 21       |

759

760

Table 2. TE origination rate calculations for relevant terminal and internal branches on the heliconiine tree (Figure 1). Color coding indicates relative counts and rates, darker green depicts higher numbers in each category.

| Branch                                 | Branch Time        | Threshold score | Branch-specific TEs | TE origination Rate | DNA | RC | LTR | LINE | SINE | Space contribution (Mb) |
|----------------------------------------|--------------------|-----------------|---------------------|---------------------|-----|----|-----|------|------|-------------------------|
| <i>D. iulia</i>                        | 26.2 mya - present | 1               | 136                 | 5.19                | 6   | 7  | 0   | 7    | 118  | 85.2                    |
| <i>A. vanillae</i>                     | 23.8 mya - present | 1               | 58                  | 2.44                | 7   | 2  | 1   | 22   | 29   | 35.7                    |
| <i>E. tales</i>                        | 18.4 mya - present | 1               | 58                  | 3.15                | 3   | 3  | 0   | 15   | 41   | 36.9                    |
| <i>Heliconius</i> ancestral branch     | 18.4 mya- 11.1 mya | 14              | 2                   | 0.27                | 0   | 1  | 0   | 1    | 0    | not examined            |
| erato-sara ancestral branch            | 11.1 mya - 5.8 mya | 5.5             | 102                 | 19.32               | 2   | 7  | 2   | 3    | 88   | 23.9                    |
| erato ancestral branch                 | 5.8 mya - 4.7 mya  | 3.5             | 9                   | 1.55                | 2   | 2  | 2   | 0    | 3    | not examined            |
| <i>H. telesiphe</i>                    | 4.7 mya - present  | 1               | 3                   | 0.64                | 1   | 0  | 0   | 0    | 2    | not examined            |
| <i>H. demeter</i>                      | 5.0 mya - present  | 1               | 1                   | 0.20                | 0   | 0  | 0   | 0    | 1    | not examined            |
| <i>H. sara</i>                         | 5.0 mya - present  | 1               | 4                   | 0.80                | 0   | 1  | 0   | 0    | 3    | not examined            |
| <i>H. doris</i>                        | 11.1 mya - present | 1               | 104                 | 9.37                | 0   | 2  | 0   | 15   | 91   | 22.3                    |
| <i>H. burneyi</i>                      | 6.6 mya - present  | 1               | 15                  | 2.26                | 3   | 0  | 0   | 6    | 8    | not examined            |
| melpomene-sylvaniform ancestral branch | 6.6 mya - 2.8 mya  | 7.5             | 130                 | 34.67               | 31  | 20 | 13  | 65   | 1    | 23.4                    |



Figures:

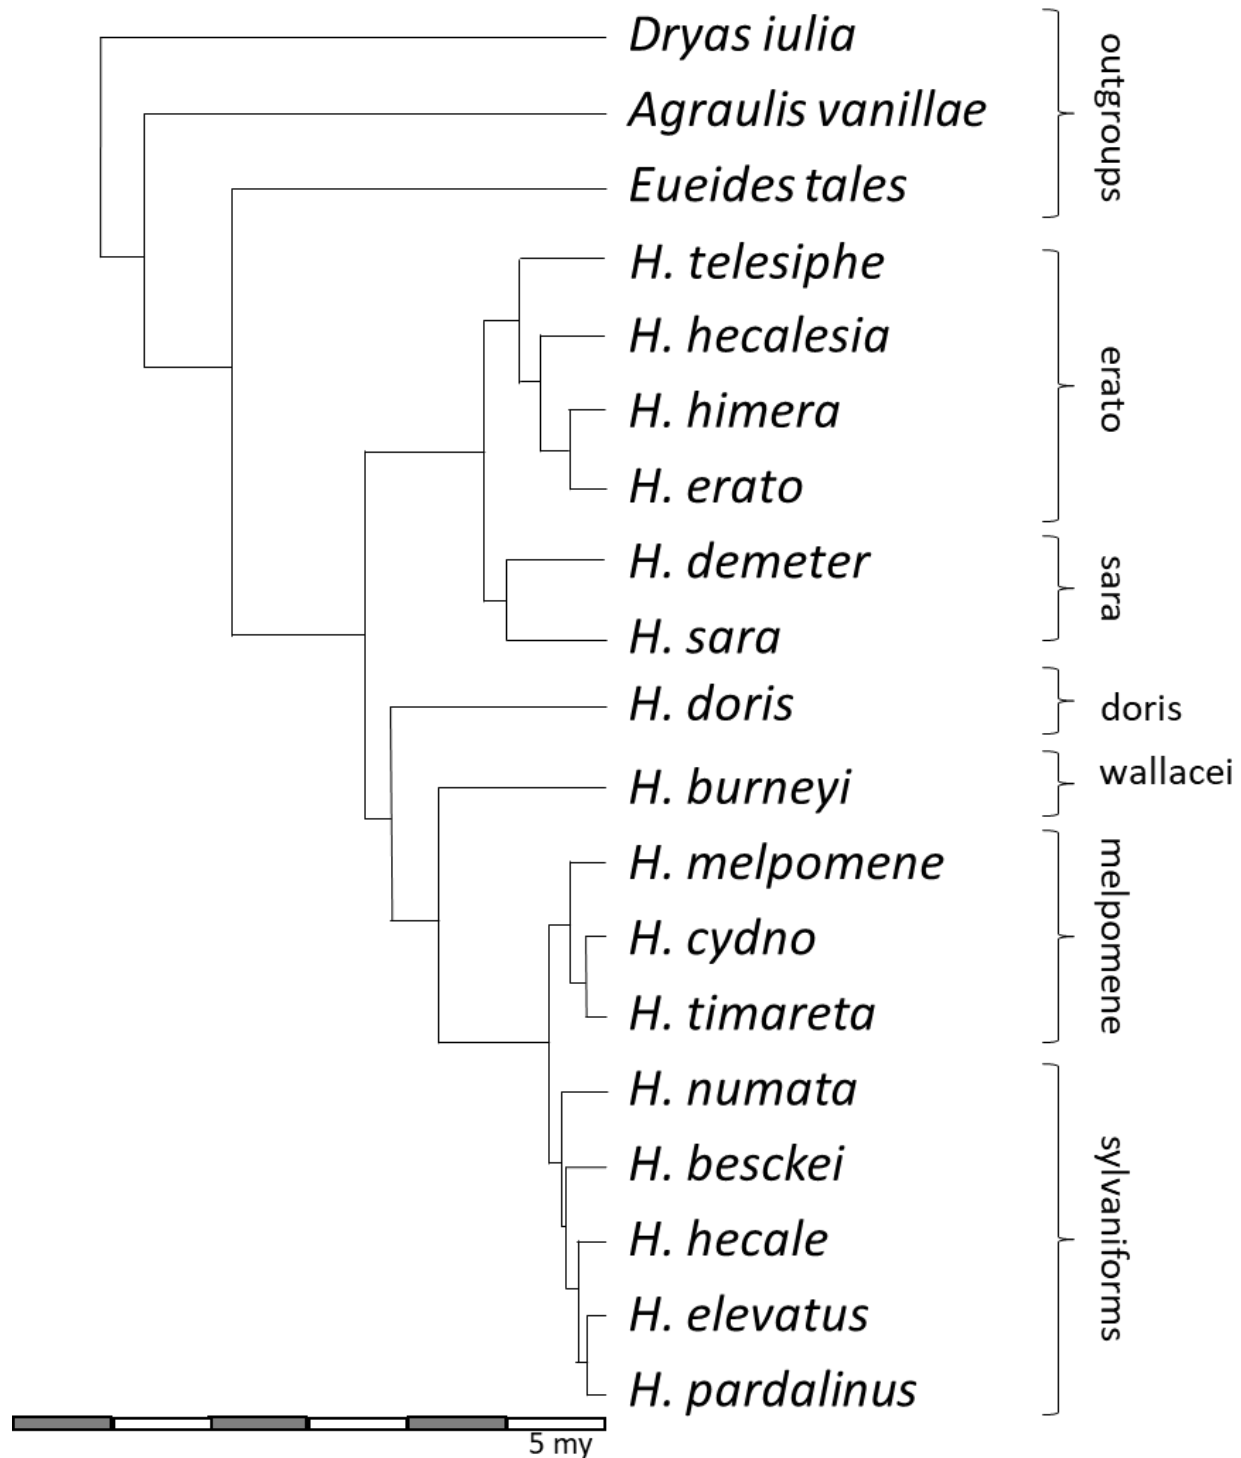

Figure 1. Phylogeny of the taxa examined, modified from Kozak et al. (2015). Subclade memberships are identified to the right of the tree.

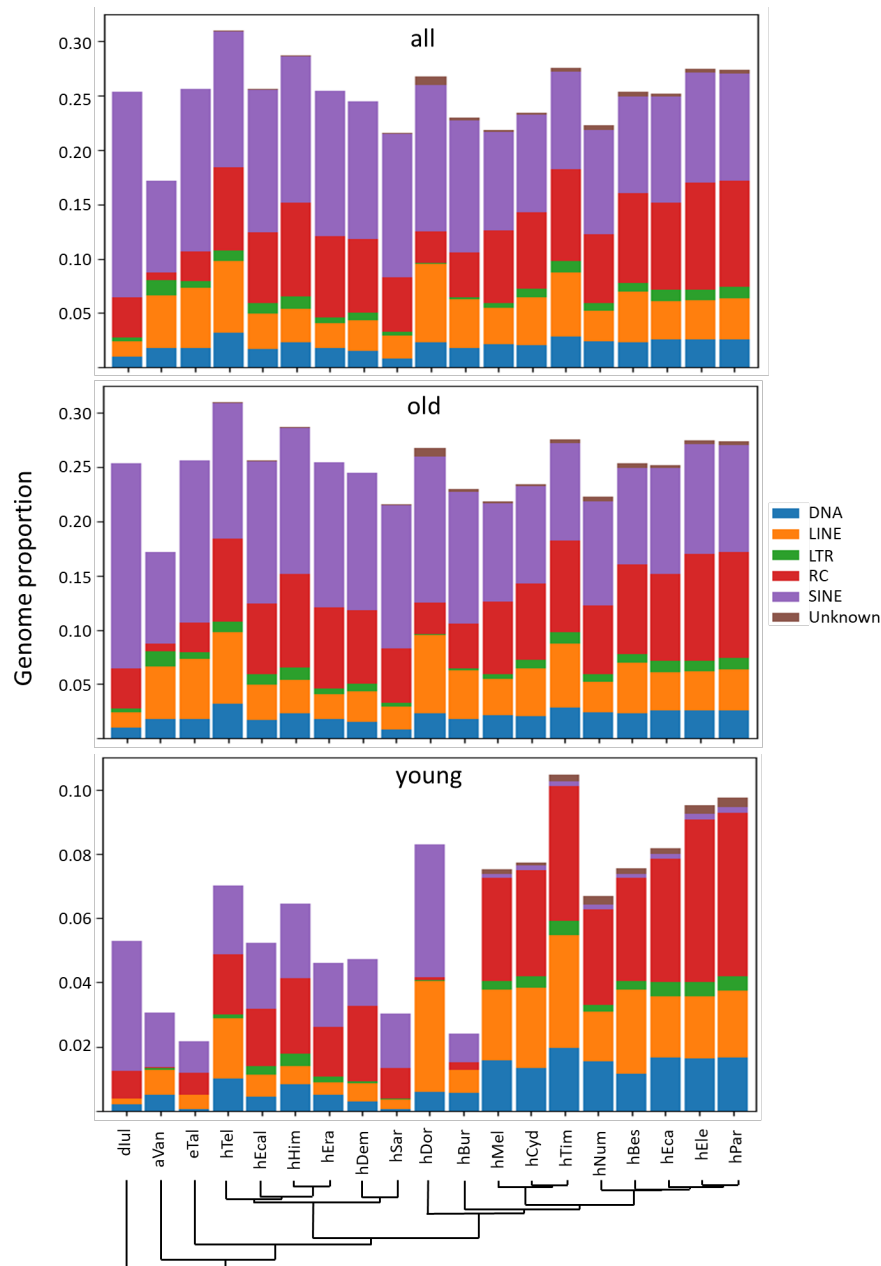

Figure 2. Stacked bar plots of TE proportions categorized as ‘old’ and ‘young’ in each species examined. The combined plot at the top represents ‘all’ data. Species and their phylogenetic relationships (Figure 1) are depicted on the X-axis. Values on the Y-axis are genome proportions calculated as described in the text. Abbreviations are as described in Supplemental Table 1. Briefly, the first letter indicates genus, and the following three (or four) letters, except in the cases of *H. hecale* and *H. hecalesia*, indicate species as listed in Figure 1.

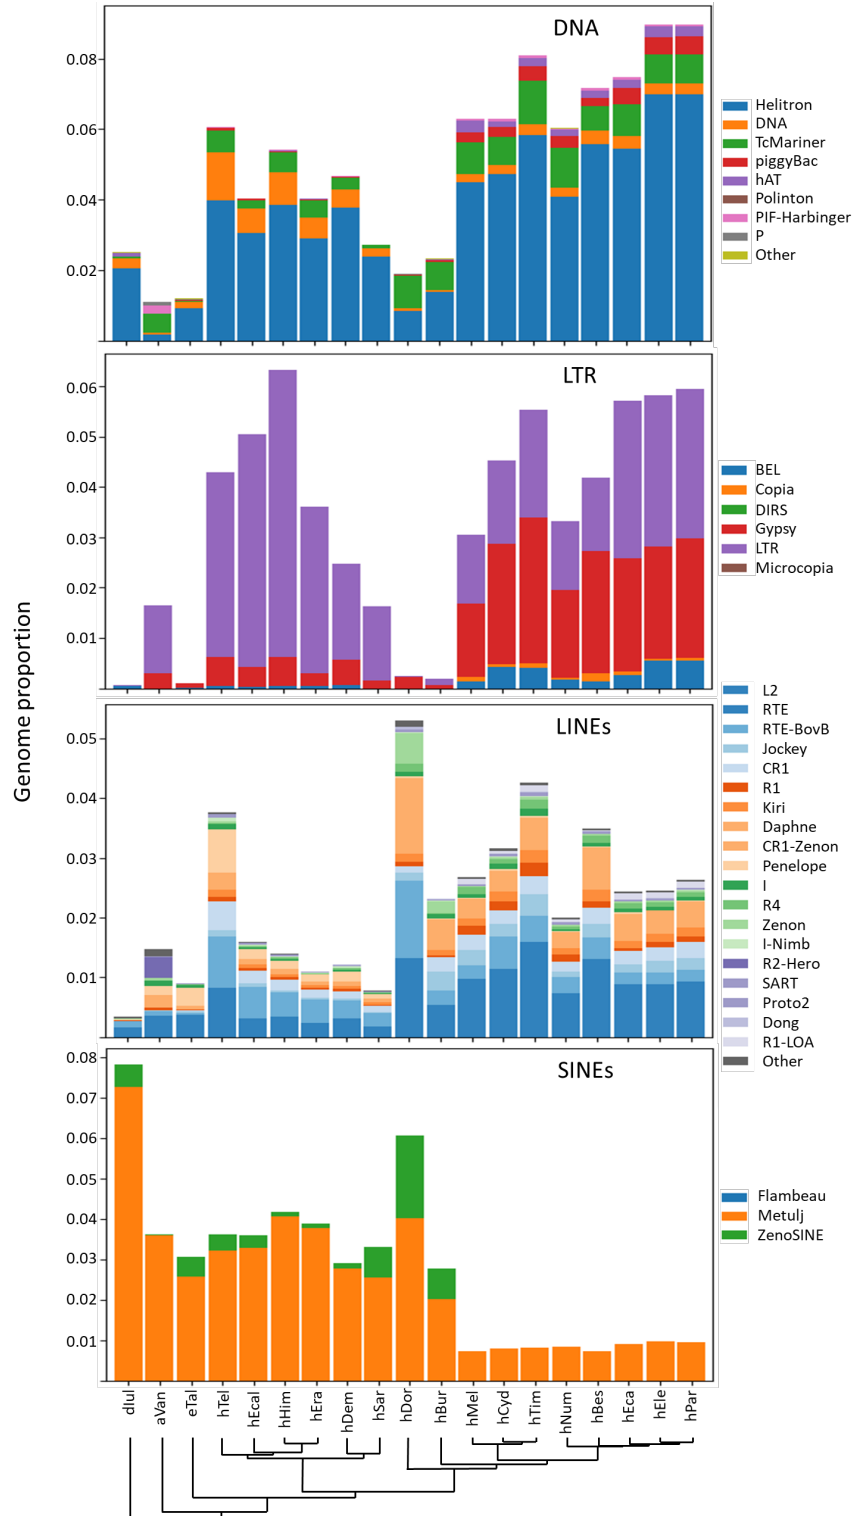

Figure 3. Recent contributions to genome content from each of the four TE classes examined. Axes and abbreviations are as described in Figure 2. Rolling circle (RC) transposons, (Helitrons) are depicted as part of the DNA transposon plot.

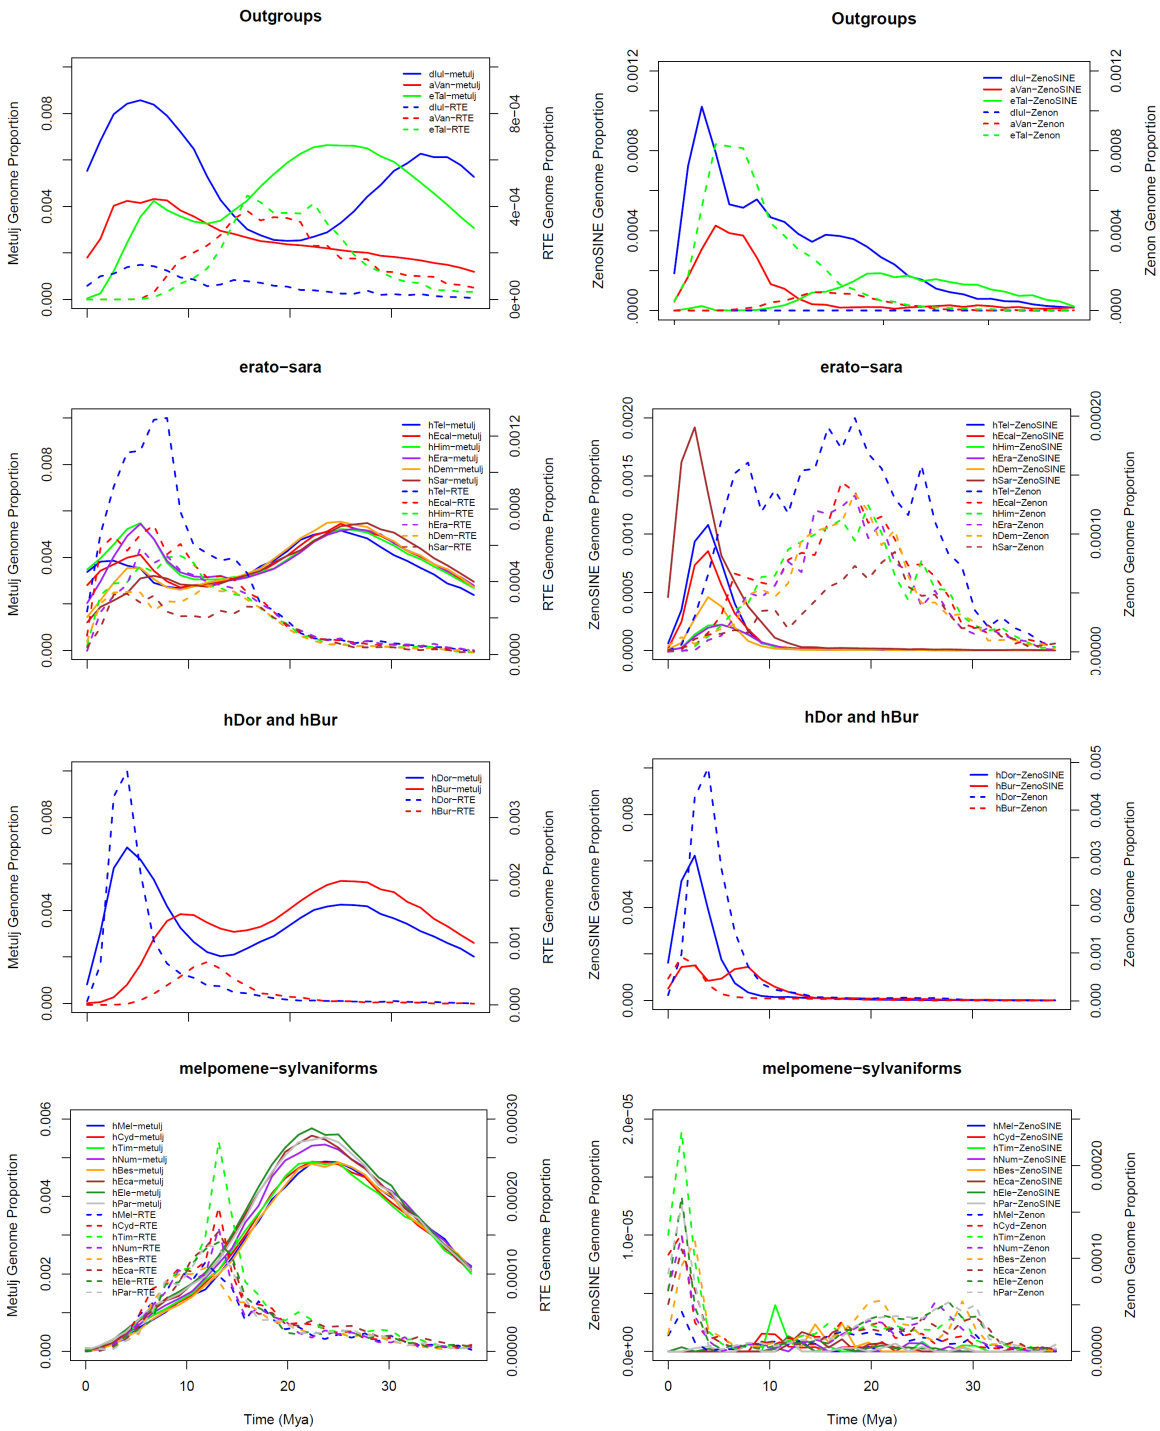

Figure 4. TE landscape plots for Metulj-RTE partners (left column) and ZenoSINE-Zenon partners (right column) in the four species divisions analyzed. The X-axis depicts the estimated time of accumulation of the TE using the mutation rate described in the text. Y-axes depict genome proportions for the SINE- (left axes) and LINE-derived (right axes) DNA in each genome.
